# Supplementary material
Source: publisher figshare collection journal article supplement (https://acs.figshare.com/ndownloader/files/5066941)
Supplement: Supplementary file 1 [file 5066941]

# Surface-Enhanced Raman Spectroscopic Study of 1,4-Phenylene Diisocyanide Adsorbed on Gold and Platinum-Group Transition Metal Electrodes

*Scott M. Gruenbaum, Matthew H. Henney, Sachin Kumar and Shouzhong Zou<sup>1</sup>*

Department of Chemistry and Biochemistry, Miami University, Oxford, OH 45056

## **Supporting information**

---

<sup>1</sup> To whom correspondence should be addressed. Tel: 513-529 8084. Fax: 513-529 5715. E-mail: [zous@muohio.edu](mailto:zous@muohio.edu).

## Supporting information 1

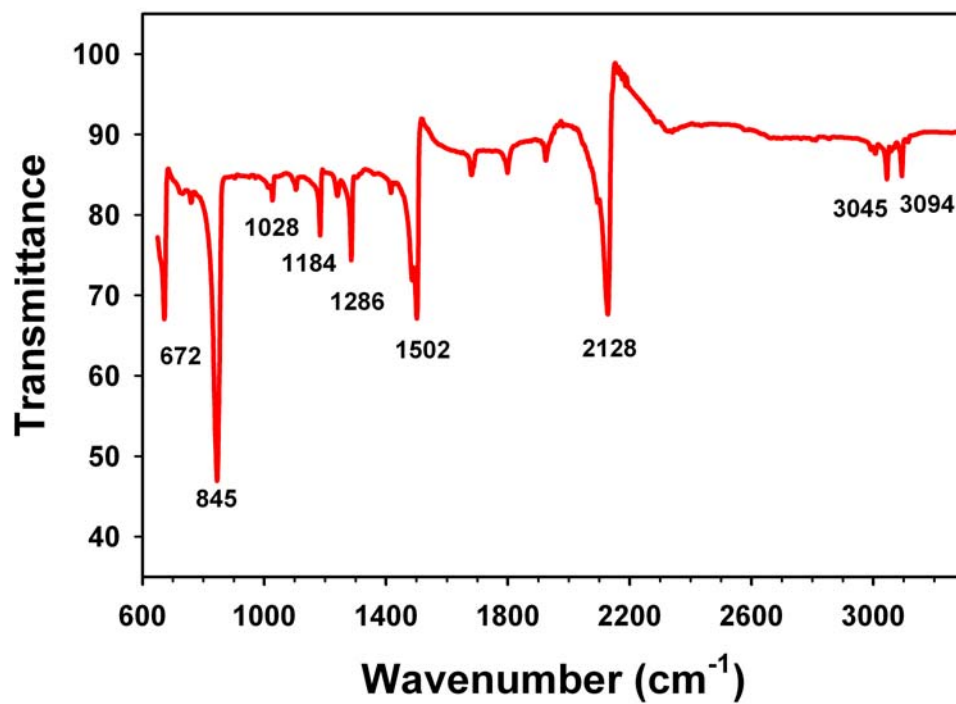

**Figure S1.** Transmittance IR spectrum of PDI powder. The band assignment is shown in Table 1.

## Supporting information 2

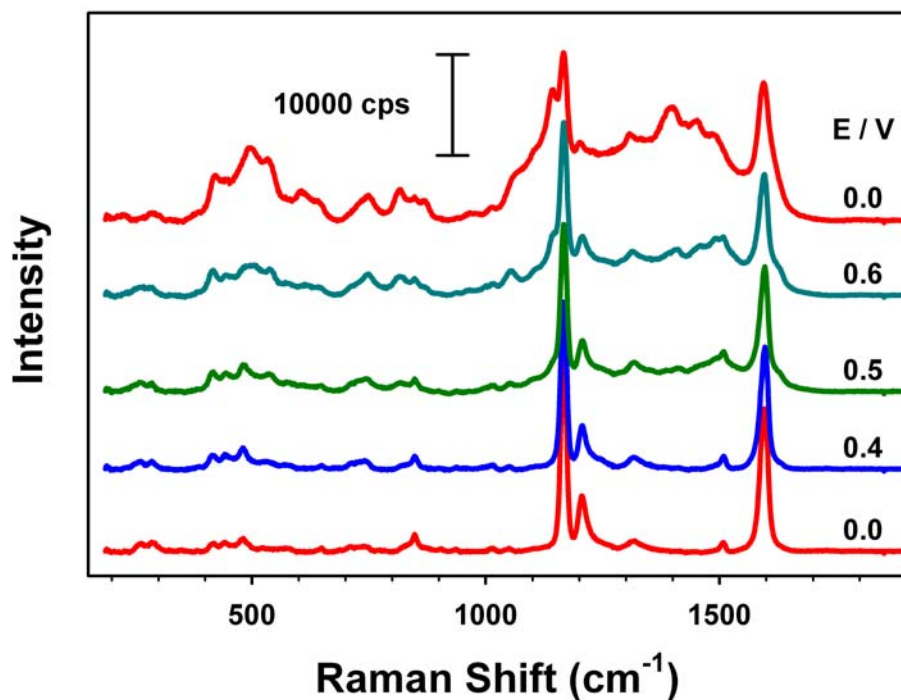

**Figure S2.** Potential-dependent SER spectra of PDI on Au in 0.1 M NaClO<sub>4</sub>, demonstrating the effect of potential excursion to more positive than +0.4 V. The potential was stepped from 0.0 V first toward positive values up to +0.8 V then returned to 0 V in 0.1 or 0.2 V increment/decrement. Only selective spectra demonstrating spectral changes are shown. The top spectrum was recorded at 0.0 V after the potential was returned from +0.8 V. Spectrum acquisition time is 2 seconds.

### Supporting information 3

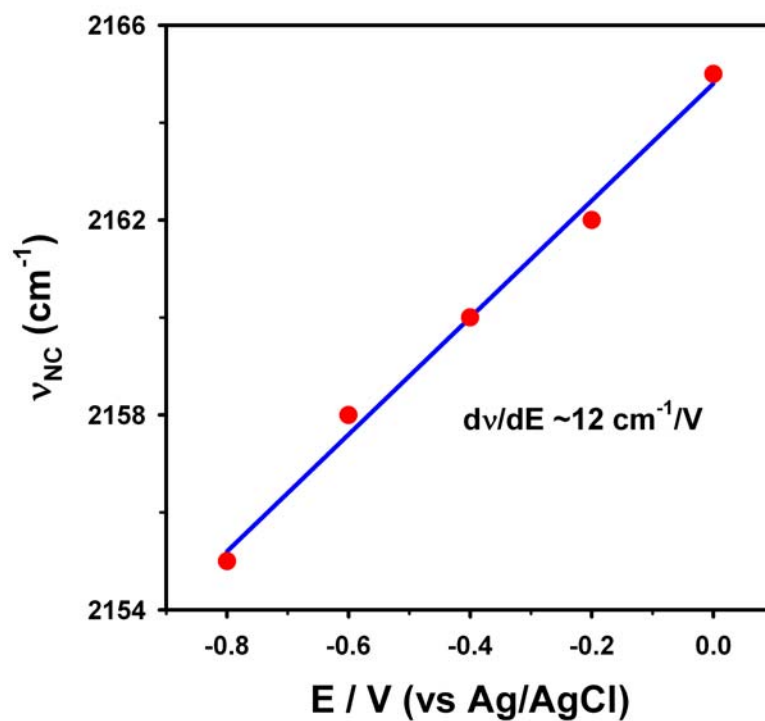

**Figure S3.** Peak frequency of N-C stretch for PDI adsorbed on Rh plotted as a function of applied potential. The data points are taken from the spectra in Figure 5B (see text).

## Supporting information 4

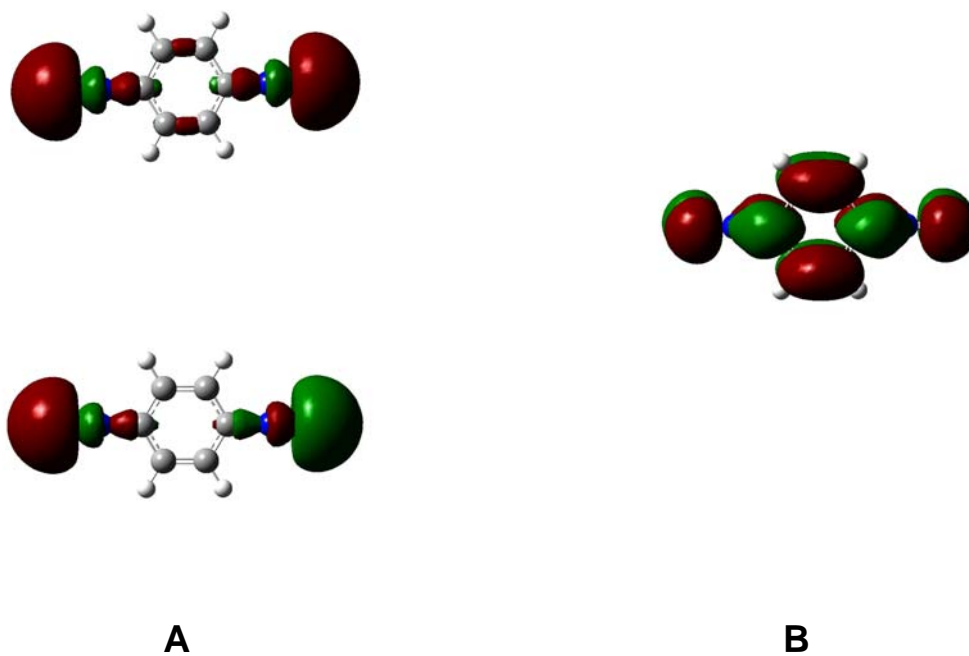

**Figure S4.** Molecular orbitals involved in PDI-metal bonding: (A) degenerate occupied orbitals for  $\sigma$ -donation; (B)  $\pi$ -back donation orbital. These orbitals are results from the DFT calculations (see text for details).
